# Supplementary material for: High-value utilization of biomass waste: from garbage floating on the ocean to high-performance rechargeable Zn–MnO2 batteries with superior safety
Source: Royal Society of Chemistry journal article supplement (doi:10.1039/d0ta05926a), 2020-01-01
Supplement: d0ta05926a1.pdf [file d0ta05926a1.pdf]

## Electronic Supplementary Information

### **High-value utilization of biomass waste: from ocean floating garbage to high-performance rechargeable Zn-MnO<sub>2</sub> batteries with superior safety**

Jiangqi Zhao,<sup>‡a</sup> Wanlin Wu,<sup>‡a</sup> Xiwen Jia,<sup>a</sup> Tian Xia,<sup>a</sup> Qingye Li,<sup>a</sup> Jian Zhang,<sup>a</sup> Qunhao Wang,<sup>a</sup> Wei Zhang<sup>\*a,b</sup> and Canhui Lu<sup>\*a,b</sup>

*a. State Key Laboratory of Polymer Materials Engineering, Polymer Research Institute at Sichuan University, Chengdu 610065, China.*

*E-mail: weizhang@scu.edu.cn; canhuilu@scu.edu.cn*

*b. Advanced Polymer Materials Research Center of Sichuan University, Shishi 362700, China.*

<sup>‡</sup> J. Zhao and W. Wu contributed equally to this work.

## Experimental Section

### Preparation of carbonized ocean garbage (COG)

The ocean garbage (OG) of reed straw was collected from the seaside in Bay Area of Berkeley, California and washed with distilled water for several times before carbonization. Then the OG was transferred into a tube furnace (OTF-1200X, Kejing, China) and heated to 240 °C at a rate of 2 °C min<sup>-1</sup> under Ar atmosphere. The samples were retained at this temperature for 1 h, followed by further heating to 800 °C at the same rate and an isothermal process for another 2 h.

### Preparation of COG@MnO<sub>2</sub>

The *in situ* growth of MnO<sub>2</sub> on the COG was realized via a typical hydrothermal method. Briefly, the obtained COG was immersed in a KMnO<sub>4</sub> aqueous solution, and the solution was kept at 60 °C for 24 h. The mass loading of MnO<sub>2</sub> could be facilely tuned by adjusting the KMnO<sub>4</sub> concentration from 0.5, 1, 2, 5, 10 to 20 mM. The obtained COG@MnO<sub>2</sub> here is the porous 3D electrode. For comparison, the porous electrode material was grinded into powder, and mixed with PVDF in a weight ratio of 9:1 using N-Methyl pyrrolidone as the solvent. The mixtures were then coated on a piece of CNT paper and dried at 60 °C in vacuum to obtain the bulk electrode.

### Preparation of COG@Zn

Zn was deposited on COG by an electrodeposition method. In brief, the COG was immersed in a mixed solution of 0.1 M zinc sulphate (ZnSO<sub>4</sub>) and 0.1 M sodium sulfate (Na<sub>2</sub>SO<sub>4</sub>). The COG was used as the working electrode and the electrodeposition was conducted at a constant voltage of -1.5 V for 10 min at room temperature.

### **Assembly of the quasi-solid-state COG@MnO<sub>2</sub>//COG@Zn battery**

The quasi-solid-state battery was assembled using the COG@MnO<sub>2</sub> as the cathode and the COG@Zn as the anode, with a piece of filter paper as the separator and PVA/LiCl–ZnCl<sub>2</sub>–MnSO<sub>4</sub> gel as the electrolyte. The gel electrolyte was prepared by mixing 1.27 g LiCl, 2.73 g ZnCl<sub>2</sub>, 0.68 g MnSO<sub>4</sub> and 1 g PVA in 10 mL deionized water, followed by vigorous stirring at 85 °C for 3 h. The electrodes and the separator were soaked in the gel electrolyte for 5 min and then left under ambient conditions to remove the unnecessary water. Finally, the electrodes and the separator were assembled together to form a quasi-solid-state battery.

### **Material Characterization**

The morphologies were observed by SEM (Inspect F50, FEI) at 20 kV and TEM (FEI Tecnai G2 F20) at 120 kV. XRD measurements were carried out on an X-ray diffractometer (X' Pert Pro MPD, Philips) using Cu K $\alpha$  (1.5406 Å) radiation. XPS spectra were recorded on a Kratos XASAM 800 spectrometer with an Al K  $\alpha$  X-ray source (1486.6 eV). Water contact angle (WCA) measurements were carried out and recorded by the contact angle measurement system (DSA 30, Kruss, Germany).

### **Electrochemical Measurement**

Cyclic voltammetry (CV) and electrochemical impedance spectroscopy (EIS) were conducted on a CHI 660E electrochemical workstation (CH Instruments Co., China). EIS tests were performed from 0.01 Hz to 100 kHz with an amplitude of 0.005 V and a potential of 0 V. Energy storage performance was characterized based on galvanostatic testing using a Land 2001A battery testing system (Wuhan, China). The electrochemical

characterizations of the obtained electrodes were performed in a two-electrode cell with COG@MnO<sub>2</sub> as the cathode and the COG@Zn as the anode, which were soaked in aqueous solution containing 2 M ZnSO<sub>4</sub> and 0.1 M MnSO<sub>4</sub>.

### **Self-Powered System Demonstration**

The customized wristband and badge with the logo of “Sichuan University” on top were used for demonstration. Before operations, the original batteries were removed from the customized wristband and badge (Figure S11). Three as-prepared quasi-solid-state batteries were connected in series, and wrapped outside with a commercial flexible solar cell (LL200-4.8-37, PowerFilm Inc., USA) to form a self-sustaining power bar (Figure 5a). The system collected and stored energy from light and finally powered the customized wristband or badge for the demonstration.

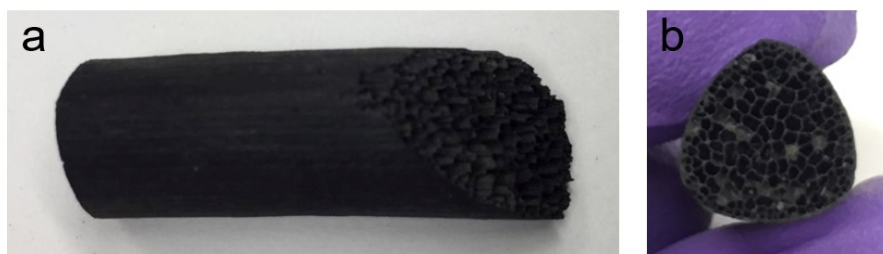

**Figure S1.** The (a) front and (b) cross-section photographs of the COG.

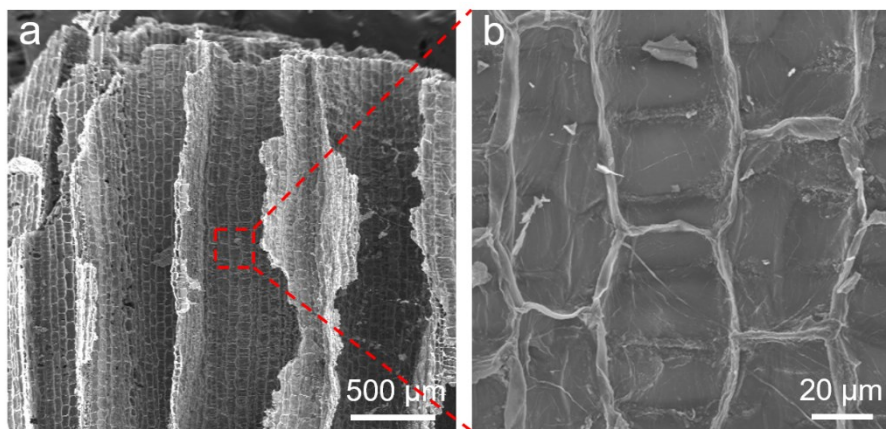

**Figure S2.** SEM images of COG: cross-section-view images showing the channels under (a) low and (b) high magnification.

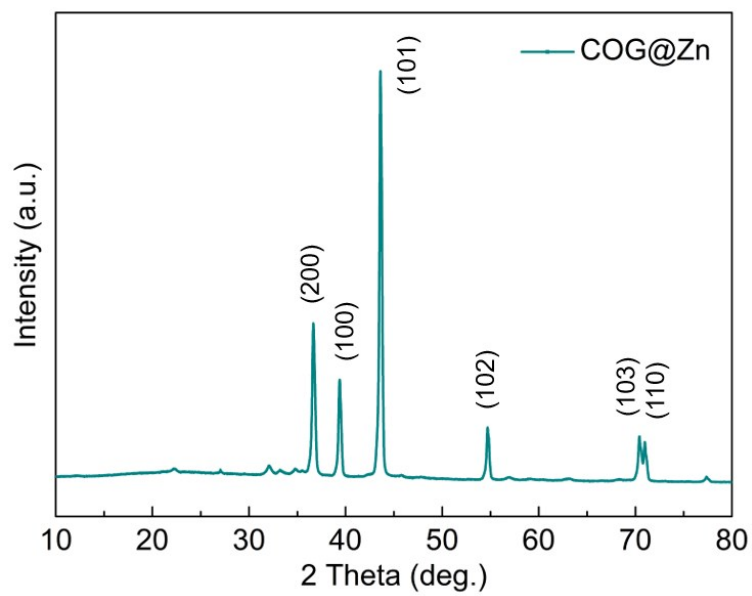

**Figure S3.** XRD spectra of the COG@Zn electrode.

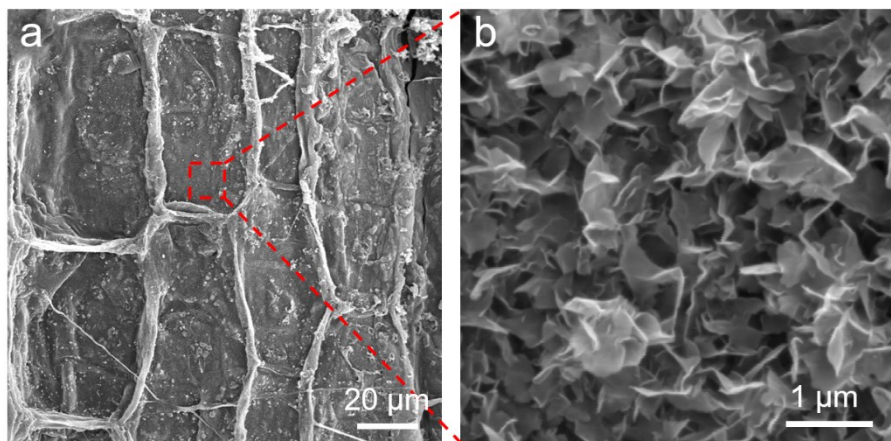

**Figure S4.** SEM images of (a) the channels in COG@MnO<sub>2</sub> electrode, and (b) the MnO<sub>2</sub> nanosheets *in situ* grown inside the channel.



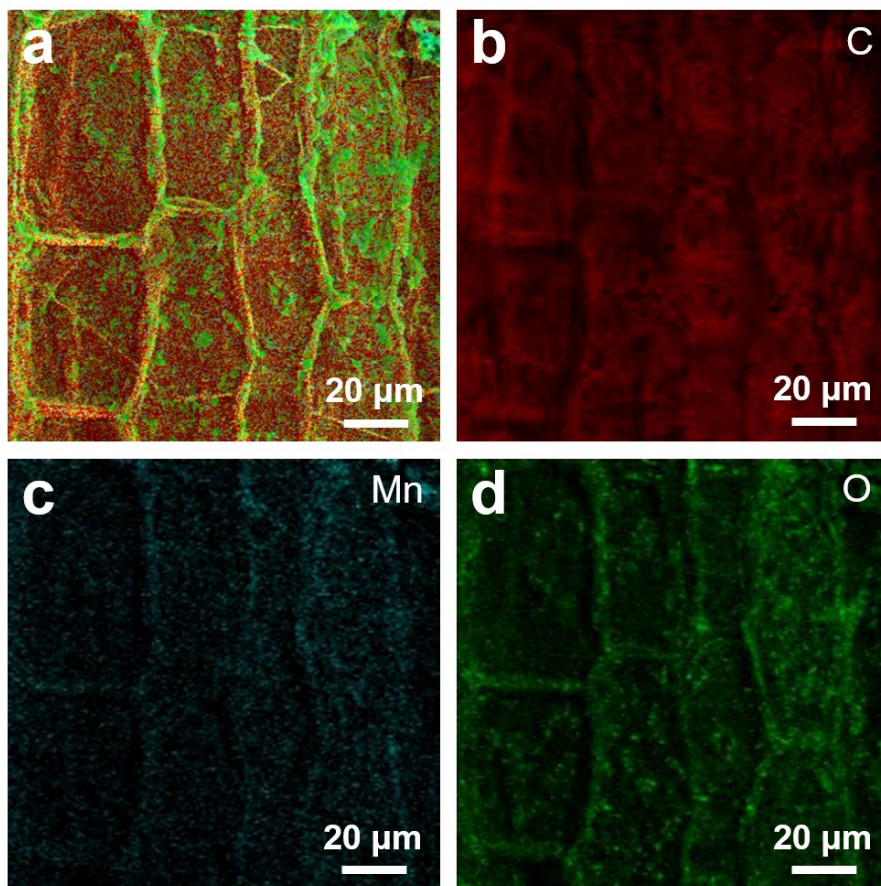

**Figure S5.** Elemental mapping images of C, Mn and O inside the channel of COG@MnO<sub>2</sub> electrode.

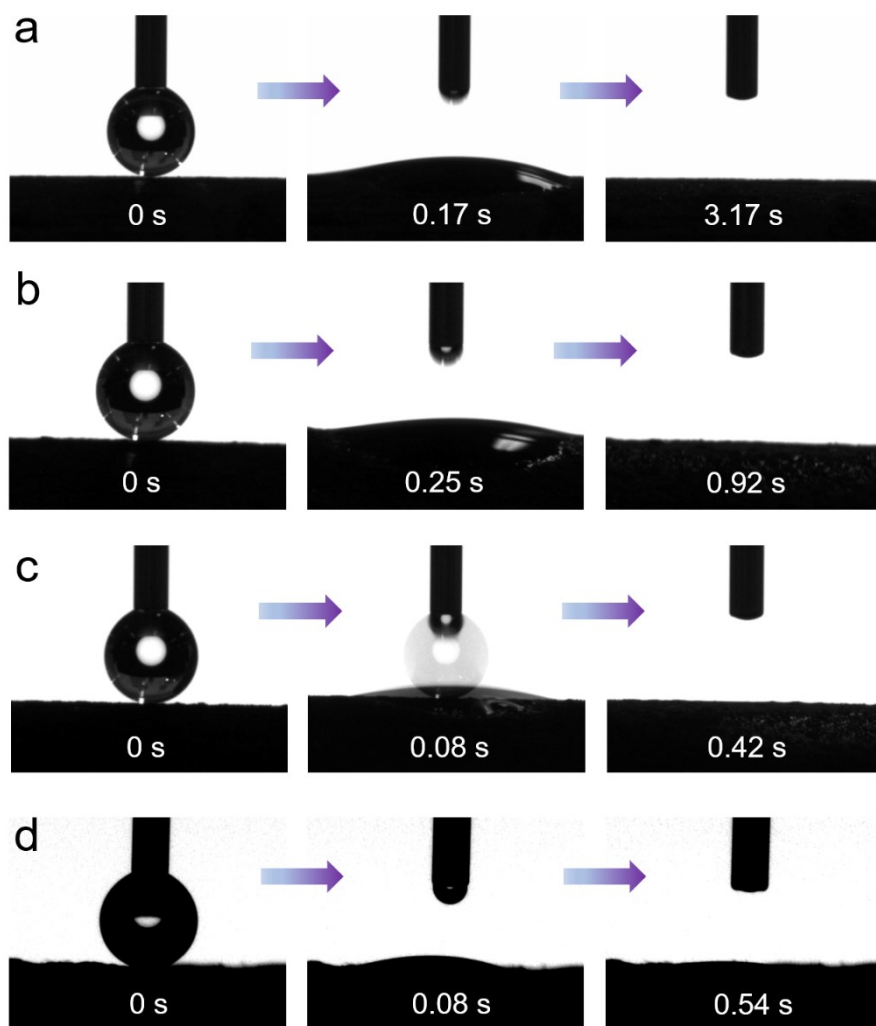

**Figure S6.** Photographs showing the measurements of hydrophilicity of (a) COG, (b) COG@Zn, (c) porous COG@MnO<sub>2</sub> and (d) bulk COG@MnO<sub>2</sub>.

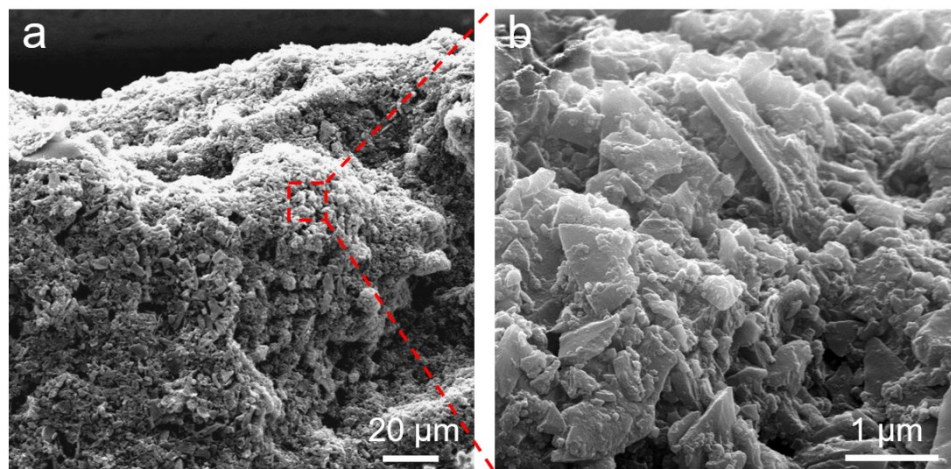

**Figure S7.** SEM images of the bulk COG@MnO<sub>2</sub> electrode with (a) low and (b) high magnification.

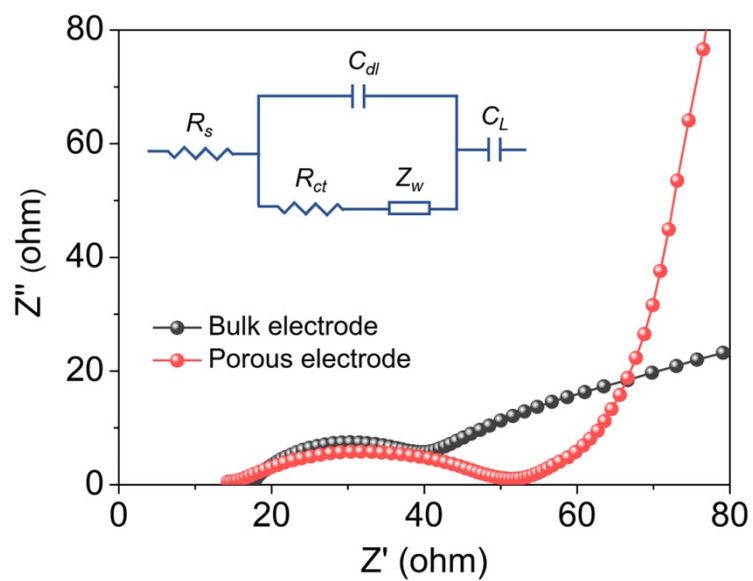

**Figure S8.** Nyquist plots for the porous and bulk COG@MnO<sub>2</sub> electrodes, the inset is the equivalent circuit.

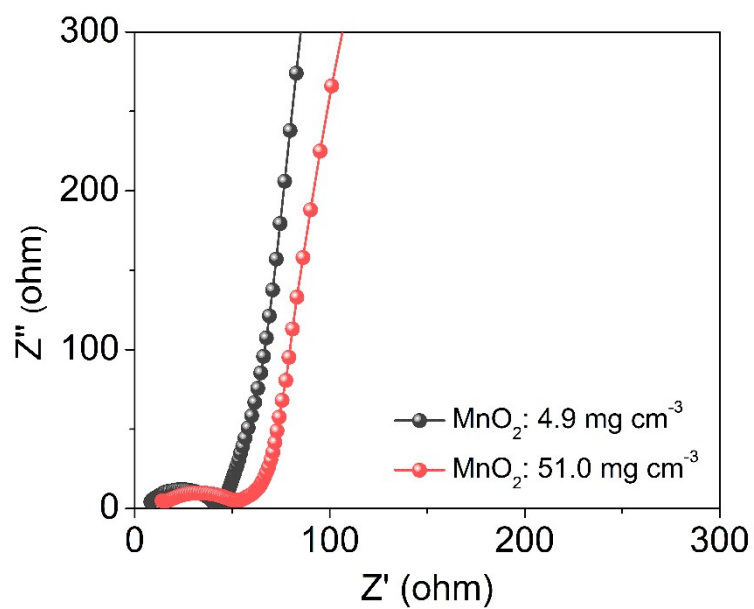

Figure S9. Nyquist plots for the COG@ $\text{MnO}_2$  electrodes with different  $\text{MnO}_2$  loadings.

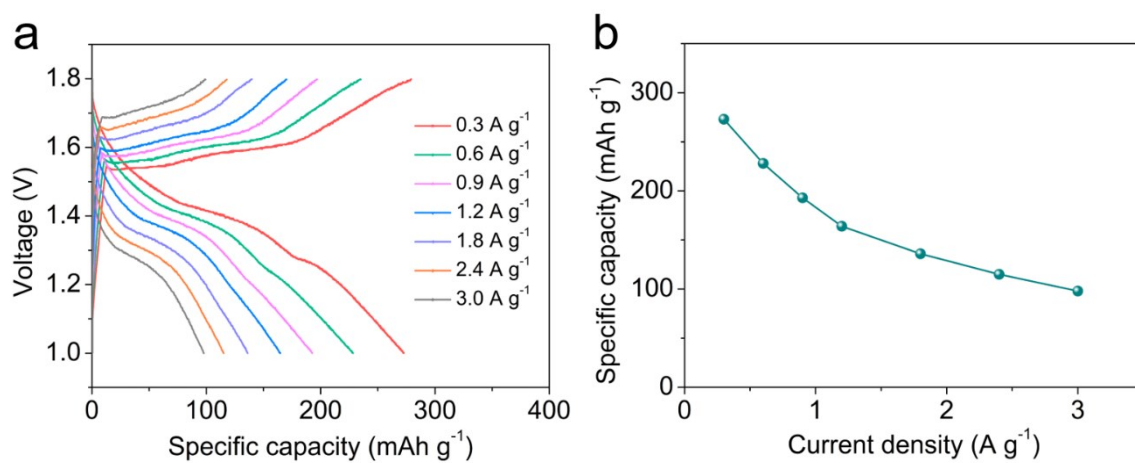

**Figure S10.** (a) Galvanostatic charge/discharge curves and (b) specific capacities of the bulk COG@MnO<sub>2</sub> electrode at different current densities.

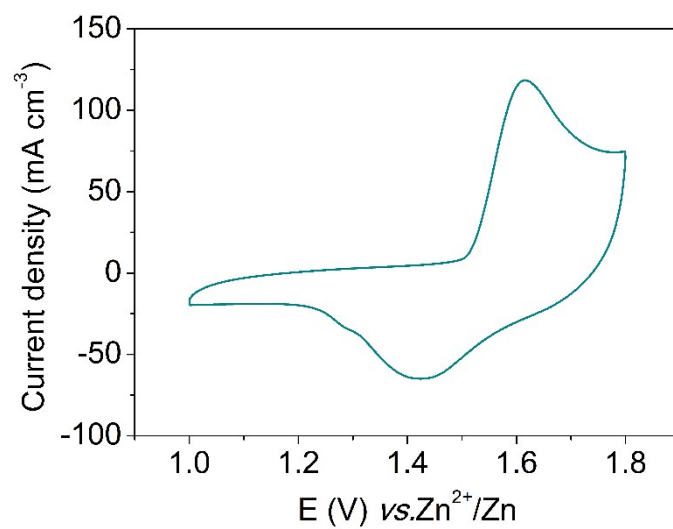

**Figure S11.** CV curve of the quasi-solid-state COG@MnO<sub>2</sub>//COG@Zn battery at 1 mV s<sup>-1</sup>.

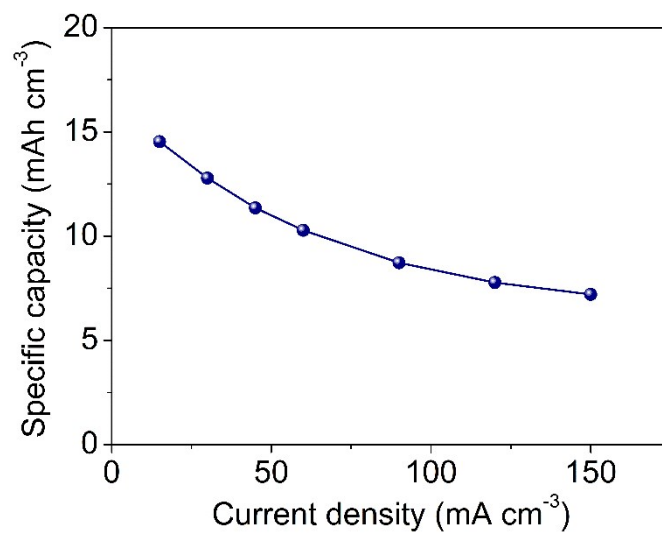

**Figure S12.** Specific capacities of the quasi-solid-state COG@MnO<sub>2</sub>//COG@Zn battery at various current densities.



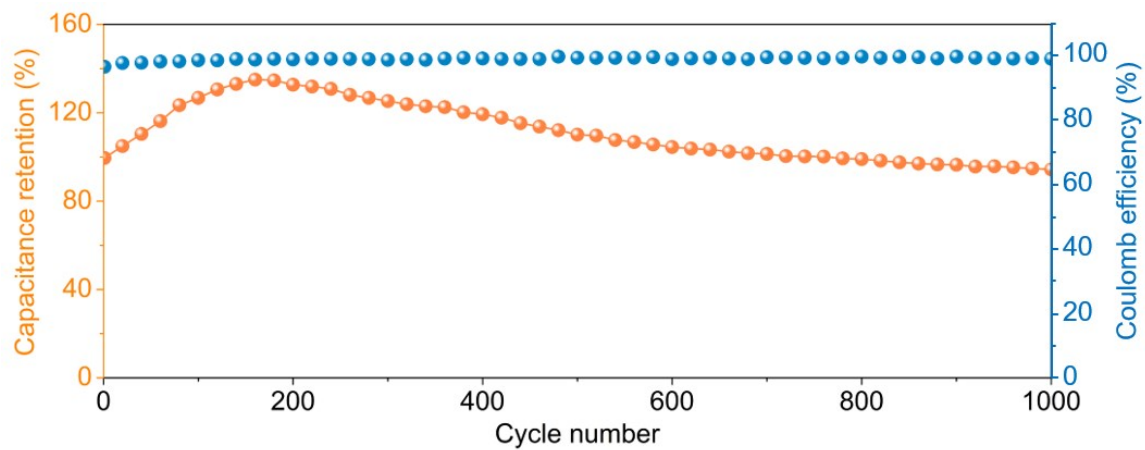

**Figure S13.** Long-term cycling performance and the corresponding Coulombic efficiency of the quasi-solid-state battery collected at  $90 \text{ mA cm}^{-3}$ .

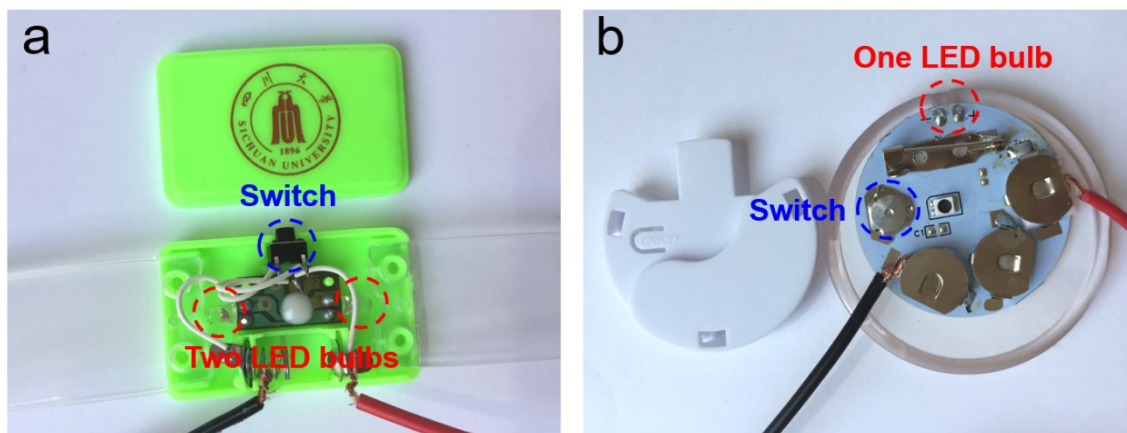

**Figure S14.** Photographs showing the interior of (a) the watch and (b) the badge.

**Table S1.** Comparison of the capacity of our Zn-MnO<sub>2</sub> battery with different aqueous batteries reported before.

| Battery                                 | Capacity (mAh g <sup>-1</sup> )                                     | Reference         |
|-----------------------------------------|---------------------------------------------------------------------|-------------------|
| Zn-MnO <sub>2</sub>                     | 210                                                                 | 1                 |
| Zn-MnO <sub>2</sub>                     | 225                                                                 | 2                 |
| Zn-MnO <sub>2</sub>                     | 285                                                                 | 3                 |
| Zn-MnO <sub>2</sub>                     | 302.1                                                               | 4                 |
| Zn-MnO <sub>2</sub>                     | 307                                                                 | 5                 |
| Zn-ZnMn <sub>2</sub> O <sub>4</sub>     | 150                                                                 | 6                 |
| Zn-PTO                                  | 336                                                                 | 7                 |
| Zn-NiCo <sub>2</sub> O <sub>4</sub>     | 183.1                                                               | 8                 |
| Zn-MoS <sub>2</sub>                     | 202.6                                                               | 9                 |
| Ni-Zn                                   | 265                                                                 | 10                |
| Zn-V <sub>2</sub> O <sub>5</sub> @PEDOT | 360                                                                 | 11                |
| <b>Zn-MnO<sub>2</sub></b>               | <b>369.7</b> (MnO <sub>2</sub> loading of 4.9 mg cm <sup>-3</sup> ) | <b>This study</b> |
| <b>Zn-MnO<sub>2</sub></b>               | <b>306.7</b> (MnO <sub>2</sub> loading of 51 mg cm <sup>-3</sup> )  | <b>This study</b> |

Note: the capacities of batteries were calculated based on the mass of active materials.

**Table S2.** Comparison of the volumetric energy density of our Zn-MnO<sub>2</sub> battery with other recently reported energy storage devices.

| Energy storage devices            | Powder density<br>(W cm <sup>-3</sup> ) | Energy density<br>(mWh cm <sup>-3</sup> ) | Reference         |
|-----------------------------------|-----------------------------------------|-------------------------------------------|-------------------|
| All metal nitrides                | 52.9                                    | 0.61                                      | 12                |
| supercapacitors                   |                                         |                                           |                   |
| Fe-MnO <sub>2</sub> ASC           | 0.36                                    | 0.89                                      | 13                |
| alkali-ion batteries              | 4.7                                     | 1.3                                       | 14                |
| WON-MnO <sub>2</sub> ASC          | 0.62                                    | 1.27                                      | 15                |
| MoN-MnO <sub>2</sub> ASC          | 0.1                                     | 2.29                                      | 16                |
| Zn-Ni battery                     | 148.54                                  | 4.05                                      | 17                |
| Zn-NiCo battery                   | 0.03                                    | 8                                         | 18                |
| Na-ion battery                    | 0.016                                   | 11.2                                      | 19                |
| Zn-MnO <sub>2</sub> battery       | 0.15                                    | 17.4                                      | 20                |
| <b>Zn-MnO<sub>2</sub> battery</b> | <b>21.1</b>                             | <b>20.5</b>                               | <b>This study</b> |

**Table S3.** Comparison of the energy density of our Zn-MnO<sub>2</sub> battery with other biomass-derived energy storage devices.

| Biomass-based<br>Energy storage devices     | Powder density<br>(W kg <sup>-1</sup> ) | Energy density<br>(Wh kg <sup>-1</sup> ) | Reference         |
|---------------------------------------------|-----------------------------------------|------------------------------------------|-------------------|
| Bacterial cellulose-based<br>supercapacitor | 220                                     | 5.8                                      | 21                |
| Bamboo-based supercapacitor                 | 100.2                                   | 6.68                                     | 22                |
| Lignin-based supercapacitor                 | 15                                      | 5.7                                      | 23                |
| Wood-based MnO <sub>2</sub> supercapacitor  | 4.6                                     | 16                                       | 24                |
| Biomass-based MnSi supercapacitor           | 604.8                                   | 24.6                                     | 25                |
| Flowers-based supercapacitor                | 273                                     | 64                                       | 26                |
| Kapok fiber-based Li-ion battery            | 83                                      | 100                                      | 27                |
| Cellulose-based Zn-ion battery              | 160                                     | 117.5                                    | 28                |
| <b>Zn-MnO<sub>2</sub> battery</b>           | <b>135.3</b>                            | <b>131.5</b>                             | <b>This study</b> |

Note: the energy density and power density were calculated based on the total mass of the energy storage devices.

**Supporting Movies:**

**Movie S1.** Demonstration of the quasi-solid-state battery powering an electronic thermometer and hygrometer under normal conditions.

**Movie S2.** Demonstration of the quasi-solid-state battery that can safely power an electronic thermometer and hygrometer under puncturing.

**Movie S3.** Demonstration of the quasi-solid-state battery that can safely power an electronic thermometer and hygrometer under bending.

**Movie S4.** Demonstration of the quasi-solid-state battery that can safely power an electronic thermometer and hygrometer under hammering.

**Movie S5.** Demonstration of the quasi-solid-state battery that can safely power an electronic thermometer and hygrometer under cutting.

**Movie S6.** Demonstration of the quasi-solid-state battery that can safely power an electronic thermometer and hygrometer under cropping.

**Movie S7.** Demonstration of the self-sustaining power bar powering the customized watch.

**Movie S8.** Demonstration of the self-sustaining power bar powering the customized badge.

## References

- 1 C. Xu, B. Li, H. Du and F. Kang, *Angew. Chem. Int. Ed.*, 2012, **51**, 933–935.
- 2 N. Zhang, F. Cheng, J. Liu, L. Wang, X. Long, X. Liu, F. Li, and J. Chen, *Nat. Commun.*, 2017, **8**, 405.
- 3 H. Pan, Y. Shao, P. Yan, Y. Cheng, K. S. Han, Z. Nie, C. Wang, J. Yang, X. Li, P. Bhattacharya, K. T. Mueller and Jun L, *Nat. Energy*, 2016, **1**, 16039.
- 4 H. Li, Z. Liu, G. Liang, Y. Huang, Y. Huang, M. Zhu, Z. Pei, Q. Xue, Z. Tang, Y. Wang, B. Li, and C. Zhi, *ACS nano*, 2018, **12**, 3140–3148.
- 5 D. Wang, H. Li, Z. Liu, Z. Tang, G. Liang, F. Mo, Q. Yang, L. Ma, C. Zhi, *Small*, 2018, **14**, 1803978.
- 6 N. Zhang, F. Cheng, Y. Liu, Q. Zhao, K. Lei, C. Chen, X. Liu, J. Chen, *J. Am. Chem. Soc.*, 2016, **138**, 12894–12901.
- 7 Z. Guo, Y. Ma, X. Dong, J. Huang, Y. Wang, and Y. Xia, *Angew. Chem. Int. Ed.*, 2018, **57**, 11737–11741.
- 8 H. Zhang, X. Zhang, H. Li, Y. Zhang, Y. Zeng, Y. Tong, P. Zhang, X. Lu, *Green Energy Environment*, 2018, **3**, 56–62.
- 9 H. Li, Q. Yang, F. Mo, G. Liang, Z. Liu, Z. Tang, L. Ma, J. Liu, Z. Shi, C. Zhi, *Energy Storage Mater.*, 2019, **19**, 94-101.
- 10 J. Liu, C. Guan, C. Zhou, Z. Fan, Q. Ke, G. Zhang, C. Liu, J. Wang, *Adv. Mater.*, 2016, **28**, 8732–8739.
- 11 D. Xu, H. Wang, F. Li, Z. Guan, R. Wang, B. He, Y. Gong, X. Hu, *Adv. Mater. Interfaces*, 2019, **6**, 1801506.

- 12 C. Zhu, P. Yang, D. Chao, X. Wang, X. Zhang, S. Chen, B. K. Tay, H. Huang, H. Zhang, W. Mai and H. J. Fan, *Adv. Mater.*, 2015, **27**, 4566–4571.
- 13 Y. Zeng, Y. Han, Y. Zhao, Y. Zeng, M. Yu, Y. Liu, H. Tang, Y. Tong and X. Lu, *Adv. Energy Mater.*, 2015, **5**, 1402176.
- 14 C. Xu, J. Liao, C. Yang, R. Wang, D. Wu, P. Zou, Z. Lin, B. Li, F. Kang and C.-P. Wong, *Nano Energy*, 2016, **30**, 900–908.
- 15 S. Dong, L. Shen, H. Li, G. Pang, H. Dou and X. Zhang, *Adv. Funct. Mater.*, 2016, **26**, 3703–3710.
- 16 M. Yu, X. Cheng, Y. Zeng, Z. Wang, Y. Tong, X. Lu, S. Yang, *Angew. Chem.*, 2016, **128**, 6874.
- 17 M. Yu, Y. Han, X. Cheng, L. Hu, Y. Zeng, M. Chen, F. Cheng, X. Lu and Y. Tong, *Adv. Mater.*, 2015, **27**, 3085–3091.
- 18 Y. Huang, W. S. Ip, Y. Y. Lau, J. Sun, J. Zeng, N. S. S. Yeung, W. S. Ng, H. Li, Z. Pei, Q. Xue, Y. Wang, J. Yu, H. Hu and C. Zhi, *ACS Nano*, 2017, **11**, 8953–8961.
- 19 Y. Li, H. Wang, L. Wang, Z. Mao, R. Wang, B. He, Y. Gong and X. Hu, *Small*, 2019, **15**, 1804539.
- 20 X. Wang, S. Zheng, F. Zhou, J. Qin, X. Shi, S. Wang, C. Sun, X. Bao, Z.-S. Wu, *Nati. Sci. Rev.*, 2020, **7**, 64-72.
- 21 L.-F. Chen, Z.-H. Huang, H.-W. Liang, W.-T. Yao, Z.-Y. Yu, S.-H. Yu, *Energy Environ. Sci.*, 2013, **6**, 3331-3338.
- 22 Y. Gong, D. Li, C. Luo, Q. Fu, C. Pan, *Green Chem.*, 2017, **19**, 4132-4140.
- 23 W. Zhang, H. Lin, Z. Lin, J. Yin, H. Lu, D. Liu, M. Zhao, *ChemSusChem*, 2015, **8**, 2114–2122.



- 24 C. Chen, Y. Zhang, Y. Li, J. Dai, J. Song, Y. Yao, Y. Gong, L. Kierzewski, J. Xie and L. Hu, *Energy Environ. Sci.*, 2017, **10**, 538-545.
- 25 Q. Wang, Y. Zhang, H. Jiang, C. Meng, *J. Colloid Interf. Sci.*, 2019, **534**, 142-155.
- 26 D. Yu, C. Chen, G. Zhao, L. Sun, B. Du, H. Zhang, Z. Li, Y. Sun, F. Besenbacher, M. Yu, *ChemSusChem*, 2018, **11**, 1678–1685.
- 27 Y. M. Zhao, Y. P. Cui, J. Shi, W. Liu, Z. C. Shi, S. G. Chen, X. Wang and H. L. Wang, *J. Mater. Chem. A*, 2017, **5**, 15243–15252.
- 28 Y. Ma, X. Xie, R. Lv, B. Na, J. Ouyang, H. Liu, *ACS Sustainable Chem. Eng.*, 2018, **6**, 7, 8697–8703.
